# Supplementary material for: Identification of Digestive Enzyme Inhibitors from Ludwigia octovalvis (Jacq.) P.H.Raven
Source: Hindawi journal article supplement (doi:10.1155/2018/8781352), 2018-01-01
Supplement: f1 [file 8781352.f1.pdf]

# Evidence-Based Complementary and Alternative Medicine

Supplementary Material

## Identification of digestive enzyme inhibitors from *Ludwigia octovalvis* (Jacq.) P.H.Raven

Dulce Morales,<sup>1,2</sup> Guillermo Ramirez,<sup>2</sup> Armando Herrera–Arellano,<sup>1</sup> Jaime Tortoriello,<sup>2</sup> Miguel Zavala,<sup>3</sup> and Alejandro Zamilpa<sup>2</sup>

<sup>1</sup> Facultad de Medicina, Universidad Autónoma del Estado de Morelos, Cuernavaca 62350, Mexico.

<sup>2</sup> Centro de Investigación Biomédica del Sur, Instituto Mexicano del Seguro Social, Xochitepec 62790, Mexico.

<sup>3</sup> Departamento de Sistemas Biológicos, UAM–Xochimilco, Mexico city 04960, Mexico.

Correspondence should be addressed to Alejandro Zamilpa;  
azamilpa\_2000@yahoo.com.mx

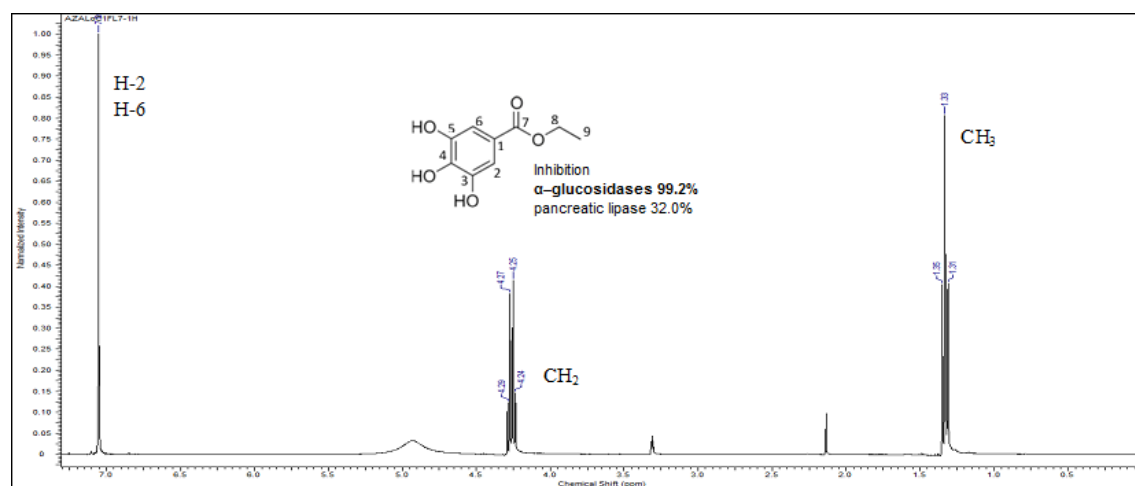

**Figure S1.** Nuclear Magnetic Resonance (NMR) <sup>1</sup>H spectrum of C1F1 and structure of the identified compound, ethyl gallate.

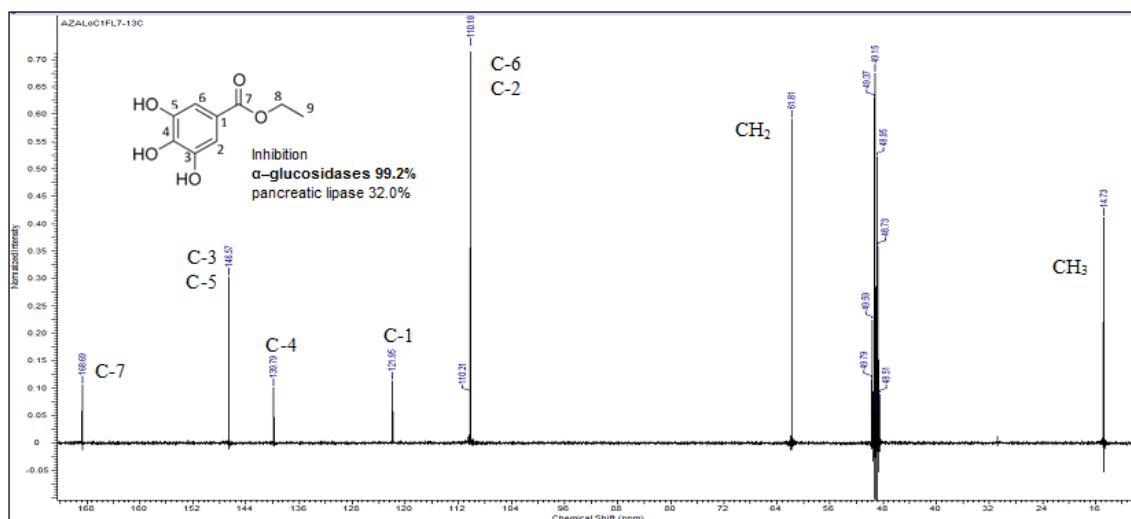

**Figure S2.** Nuclear Magnetic Resonance (NMR)  $^{13}\text{C}$  spectrum of C1F1 and structure of the identified compound, ethyl gallate.

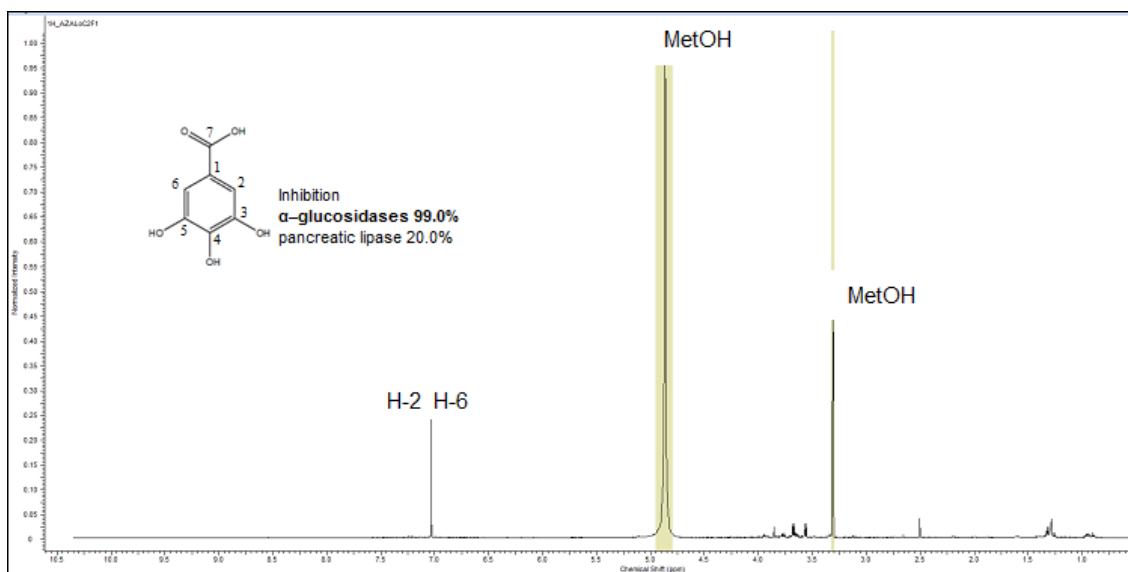

**Figure S3.** Nuclear Magnetic Resonance (NMR)  $^1\text{H}$  spectrum of C2F1 and structure of the identified compound, gallic acid.

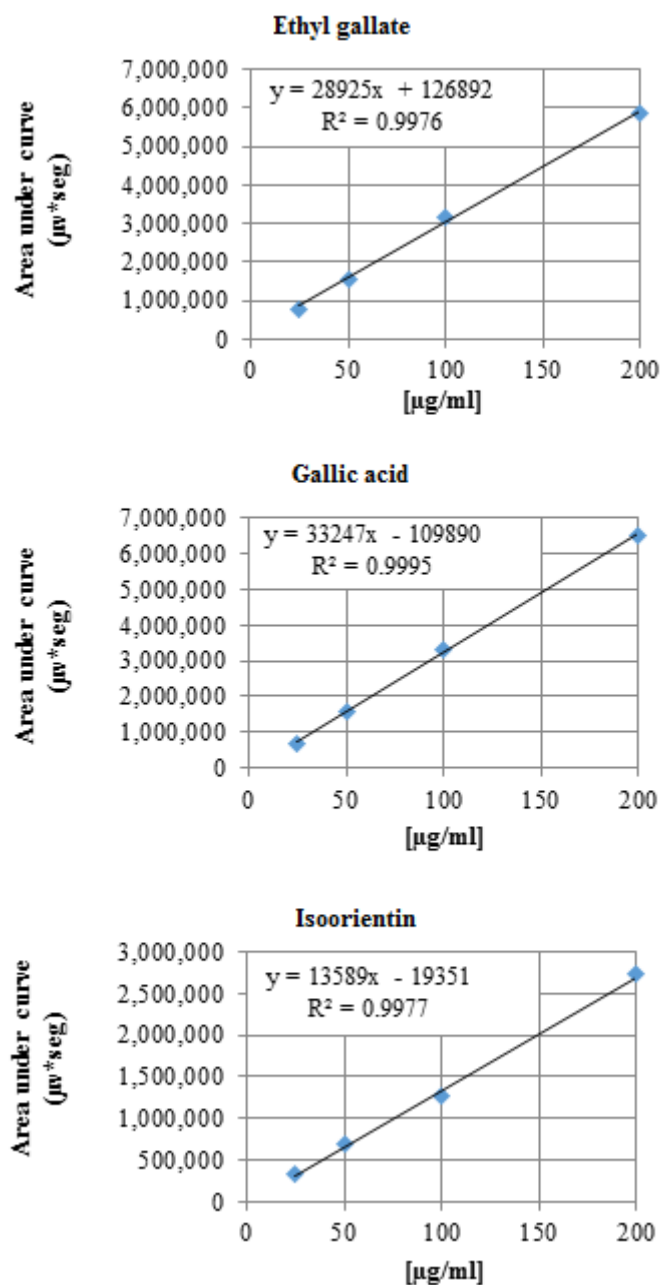

**Figure S4.** Calibration curves of the HPLC analysis of the isolated compounds and their straight-line equations.

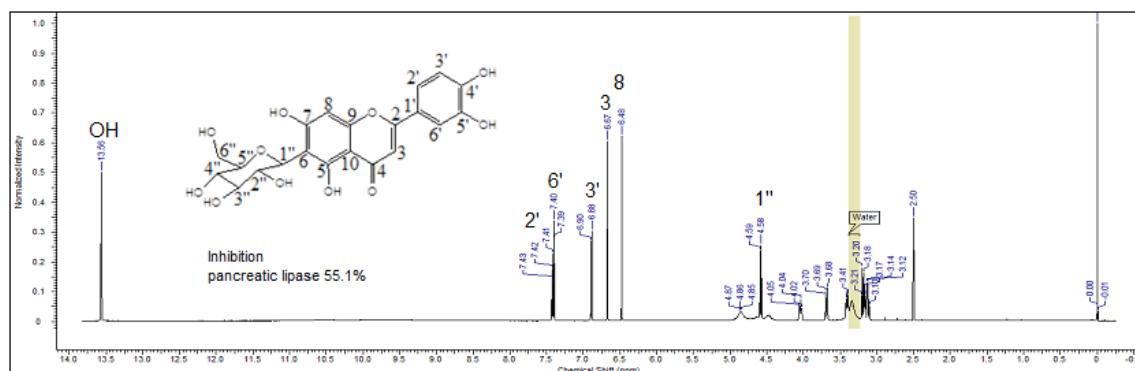

**Figure S5.** Nuclear Magnetic Resonance (NMR)  $^1\text{H}$  spectrum of C4F4-P and structure of the identified compound, isorientin.

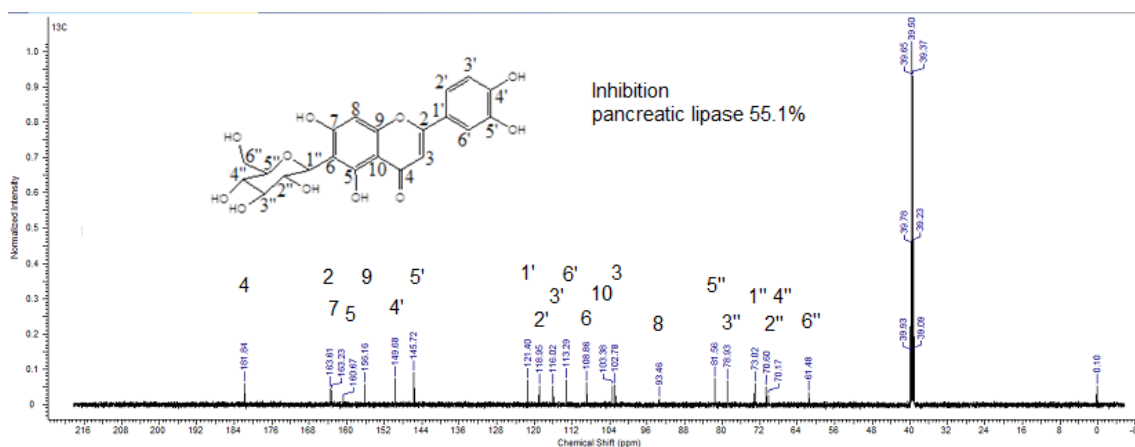

**Figure S6.** Nuclear Magnetic Resonance (NMR)  $^{13}\text{C}$  spectrum of C4F4-P and structure of the identified compound, isorientin.

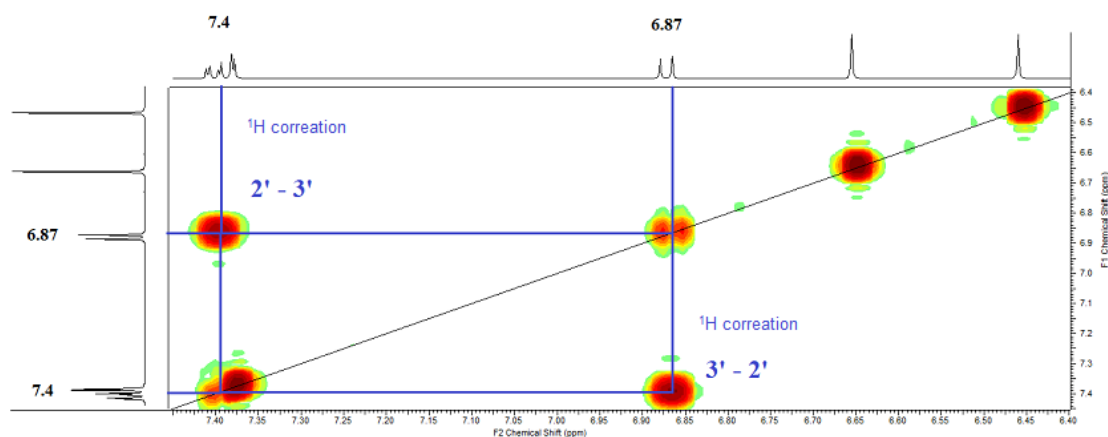

**Figure S7.** Correlation Spectroscopy (COSY) of C4F4-P.

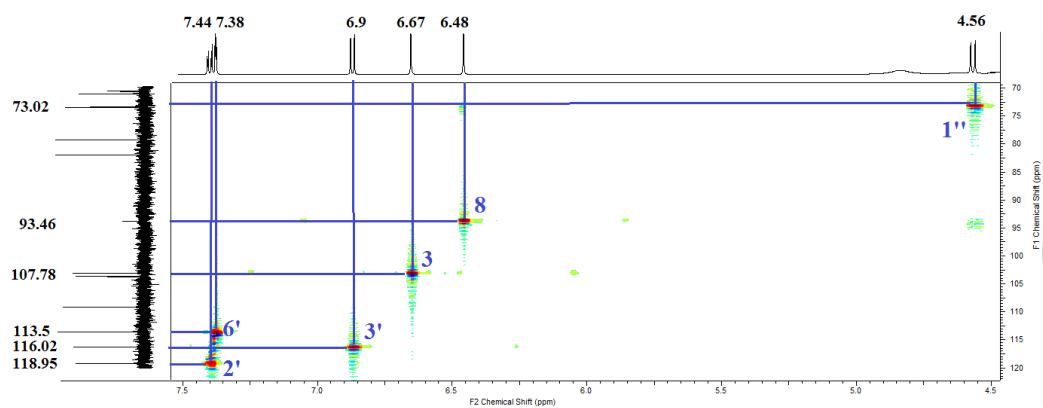

**Figure S8.** Heteronuclear Single Quantum Coherence spectroscopy (HSQC) of C4F4-P.

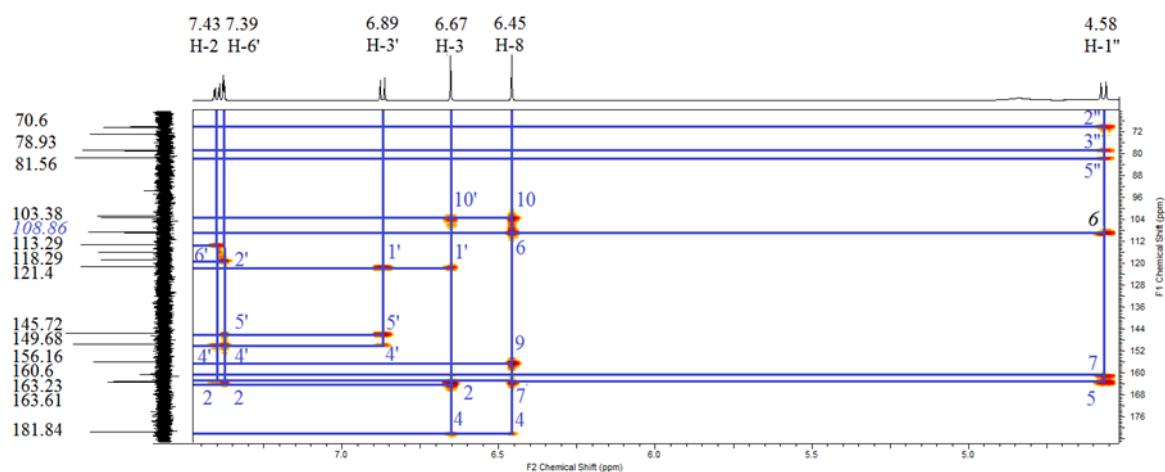

**Figure S9.** Heteronuclear Multiple Bond Correlation spectroscopy (HMBC) of C4F4-P.
